# Supplementary material
Source: PubMed Central journal article supplement (PMC6591081)
Supplement: NIHMS1521987-supplement-1.pdf [file NIHMS1521987-supplement-1.pdf]

# A 'Dual' Cell-Level Systems PK-PD Model to Characterize the Bystander Effect of ADC

Aman P. Singh<sup>1</sup> and Dhaval K. Shah<sup>1\*</sup>

---

; A Dual In-Vitro PK Model for T-vc-MMAE in Cocultures of GFP-MCF7 and N87 Cells

Method STIFF

STARTTIME = 0 ; hrs  
STOPTIME = 120 ; hrs  
DT=1e-3 ; Integration time step (only Euler, RK2, RK4)  
DTMAX=0.001 ; Maximum DT (only Auto stepsize and Stiff)  
TOLERANCE=0.00001 ; Relative accuracy for Auto and Stiff integration  
methods  
DTOUT = 1.0 ; Output time interval (0, store every step)

;%%%%%%%%%ADC Pharmacokinetics States %%%%%%%%%%

init ADC\_M = Conc ; T-vc-MMAE in media in nM  
init D\_M = 0.1\*MV; Amount of MMAE in Media in Nano Moles

init NC\_N87 = (Percent\_N87/100)\*Total\_init\_cells  
init NC\_MCF7 = (1-Percent\_N87/100)\*Total\_init\_cells

init DAR = 4.8; Initial DAR value

init ADC\_b\_N87 = 0; Number of ADC-receptor complexes per cell (#/cell)  
init ADC\_lyso\_N87 = 0; Number of ADC-receptor complexes in lysosomal space per cell (#/cell)  
init D\_f\_N87 = 0; Number of Drug Molecules inside cytosol (#/cell)  
init D\_b\_N87 = 0; Number of Drug Molecules bound to tubulin (#/cell)

init ADC\_b\_MCF7 = 0; Number of ADC-receptor complexes per cell (#/cell)  
init ADC\_lyso\_MCF7 = 0; Number of ADC-receptor complexes in lysosomal space per cell (#/cell)  
init D\_f\_MCF7 = 0; Number of Drug Molecules inside cytosol (#/cell)  
init D\_b\_MCF7 = 0; Number of Drug Molecules bound to tubulin (#/cell)

;%%%%%%%%%ADC Pharmacokinetics Equations%%%%%%%%%

SF = (1/6.023E+23)\*1E+9 ; Scaling Factor to convert # molecules into nMoles  
Conc = 75 ; Incubating Concentration of ADC (in nM)  
Total\_init\_cells = 10000; total cell seeding density  
Percent\_N87 = 10; %

;%%%%%%%%%% MEDIA EQUATIONS %%%%%%%%%%

$$\begin{aligned} d/dt(ADC\_M) = & (-Kon*ADC\_M*(Agex\_N87-ADC\_b\_N87) + \\ & Koff*ADC\_b\_N87)*NC\_N87*SF/MV + \\ & (-Kon*ADC\_M*(Agex\_MCF7-ADC\_b\_MCF7) + Koff*ADC\_b\_MCF7)*NC\_MCF7*SF/MV - \\ & Kdec*ADC\_M \end{aligned}$$

$$\begin{aligned} d/dt(D\_M) = & Kdec*ADC\_M*DAR*MV + (Kdec*ADC\_b\_N87*DAR + \\ & Keff\_N87*D\_f\_N87)*NC\_N87*SF + (Kdec*ADC\_b\_MCF7*DAR + \\ & Keff\_MCF7*D\_f\_MCF7)*NC\_MCF7*SF - Kdiff\_N87*(Vcell\_N87/MV)*D\_M - \\ & Kdiff\_MCF7*(Vcell\_MCF7/MV)*D\_M \end{aligned}$$

;%%%%%%%%%% CELL EQUATIONS in NUMBER N87 %%%%%%%%%%

$$d/dt(ADC\_b\_N87) = Kon*ADC\_M*(Agex\_N87-ADC\_b\_N87) - Koff*ADC\_b\_N87 - Kdec*ADC\_b\_N87 - Kint*ADC\_b\_N87$$

$$d/dt(ADC\_lyso\_N87) = Kint*ADC\_b\_N87 - Kdeg*ADC\_lyso\_N87$$

$$\begin{aligned} d/dt(D\_f\_N87) = & Kdeg*ADC\_lyso\_N87*DAR - Keff\_N87*D\_f\_N87 - \\ & Kon\_tub\_N87*D\_f\_N87*(Tub\_N87-D\_b\_N87) + Koff\_tub*D\_b\_N87 \\ & +Kdiff\_N87*(Vcell\_N87/MV)*(D\_M/SF) \end{aligned}$$

$$d/dt(D\_b\_N87) = Kon\_tub\_N87*D\_f\_N87*(Tub\_N87-D\_b\_N87) - Koff\_tub*D\_b\_N87$$

;%%%%%%%%%% CELL EQUATIONS in NUMBER N87 (END) %%%%%%%%%%

;%%%%%%%%%% CELL EQUATIONS in NUMBER MCF7 %%%%%%%%%%

$$d/dt(ADC\_b\_MCF7) = Kon*ADC\_M*(Agex\_MCF7-ADC\_b\_MCF7) - Koff*ADC\_b\_MCF7 - Kdec*ADC\_b\_MCF7 - Kint*ADC\_b\_MCF7$$

$$d/dt(ADC\_lyso\_MCF7) = Kint*ADC\_b\_MCF7 - Kdeg*ADC\_lyso\_MCF7$$

$$\begin{aligned} d/dt(D\_f\_MCF7) = & Kdeg*ADC\_lyso\_MCF7*DAR - Keff\_MCF7*D\_f\_MCF7 - \\ & Kon\_tub\_MCF7*D\_f\_MCF7*(Tub\_MCF7-D\_b\_MCF7) + Koff\_tub*D\_b\_MCF7 \\ & +Kdiff\_MCF7*(Vcell\_MCF7/MV)*(D\_M/SF) \end{aligned}$$

$$d/dt(D\_b\_MCF7) = Kon\_tub\_MCF7*D\_f\_MCF7*(Tub\_MCF7-D\_b\_MCF7) - Koff\_tub*D\_b\_MCF7$$

;%%%%%%%%%% CELL EQUATIONS in NUMBER MCF7 (END) %%%%%%%%%%

DT\_MCF7 =35.0; hours

DT\_N87 = 40.10; hours

MCF7\_max = 100; 000

N87\_max = 80.5

$$Kg\_MCF7 = (0.693/DT\_MCF7)*(1-(NC\_MCF7)/(MCF7\_max*1e+3));$$

$$Kg\_N87 = (0.693/DT\_N87) * (1 - (NC\_N87)/(N87\_max * 1e+3))$$

$$d/dt(NC\_N87) = Kg\_N87 * NC\_N87$$

$$d/dt(NC\_MCF7) = Kg\_MCF7 * NC\_MCF7$$

;%%% ADC Deconjugation Rate %%%%

$$d/dt(DAR) = -Kdec * DAR$$

;%%% Parameters %%%%

$$Vcell\_MCF7 = 8 * 1E-12; \text{ L volume of MCF7 cells}$$

$$Vcell\_N87 = 4.12 * 1E-12; \text{ L volume of N87 cells}$$

$$MV = 0.0001; \text{ L (media volume)}$$

$$Kdiff\_N87 = 2.41; \text{ 1/h (estimated)}$$

$$Kdiff\_MCF7 = 7.72; \text{ 1/h (estimated)}$$

$$Keff\_MCF7 = 0.131$$

$$Keff\_N87 = 0.156$$

$$Tub\_N87 = (65 * Vcell\_N87) / SF; \text{ \#/cell of tubulin in a Cell}$$

$$Tub\_MCF7 = (65 * Vcell\_MCF7) / SF; \text{ \#/cell of tubulin in a Cell}$$

$$Kon\_tub\_N87 = 0.44 * SF * Vcell\_N87 / 24; \text{ 1/\#/Cell/hr}$$

$$Kon\_tub\_MCF7 = 0.44 * SF * Vcell\_MCF7 / 24; \text{ 1/\#/Cell/hr}$$

$$Koff\_tub = 13.1 / 24; \text{ 1/hr}$$

$$Kon = 0.03; \text{ 1/nM/hr}$$

$$Koff = 0.014; \text{ 1/hr}$$

$$Kint = 0.11; \text{ 1/hr}$$

$$Kdeg = 0.3; \text{ 1/hr}$$

$$Kdec = 0.000007; \text{ 1/hr}$$

$$Agex\_MCF7 = 0.052 * 1e+6; \text{ \# of HER2 receptors on a cell.}$$

$$Agex\_N87 = 0.95 * 1e+6; \text{ \# of HER2 receptors on a cell.}$$

;%%% OUTPUT %%%%

$$Media\_MMAE\_f = D\_M / MV; \text{ Concentration of MMAE in Media (nM)}$$

$$Media\_MMAE\_T = ((D\_M / MV) + ADC\_M * DAR); \text{ Concentration of Total MMAE in Media (nM)}$$

$$Media\_TTmAb = ADC\_M; \text{ Concentration of Total Antibody in Media (nM)}$$

$$Cell\_MMAE\_f\_MCF7 = (D\_f\_MCF7 + D\_b\_MCF7) * SF / Vcell\_MCF7;$$

$$Cell\_MMAE\_f\_N87 = (D\_f\_N87 + D\_b\_N87) * SF / Vcell\_N87$$

$$Cell\_MMAE\_T\_MCF7 = (D\_f\_MCF7 +$$

$$D\_b\_MCF7 + (ADC\_b\_MCF7 + ADC\_lyso\_MCF7) * DAR) * SF / Vcell\_MCF7$$

$$Cell\_MMAE\_T\_N87 = (D\_f\_N87 +$$

$$D\_b\_N87 + (ADC\_b\_N87 + ADC\_lyso\_N87) * DAR) * SF / Vcell\_N87$$

$$Cell\_TTmAb\_MCF7 = (ADC\_lyso\_MCF7) * SF / (Vcell\_MCF7); \text{ Concentration of Total Antibody in Cell (nM)}$$

$$Cell\_TTmAb\_N87 = (ADC\_lyso\_N87) * SF / (Vcell\_N87); \text{ Concentration of Total Antibody in Cell (nM)}$$
